# Supplementary material
Source: publisher figshare collection journal article supplement (https://karger.figshare.com/articles/dataset/_/4840370)
Supplement: Supplementary file 2 [file 1]

Archive with 3 entries (3 files):
- HRP470842_sm2.pdf
- HRP470842_sm3.pdf
- HRP470842_sm1.doc
