# Supplementary material
Source: publisher figshare collection journal article supplement (https://karger.figshare.com/articles/dataset/_/4840370)

## Supplemental Figure 2

**A**

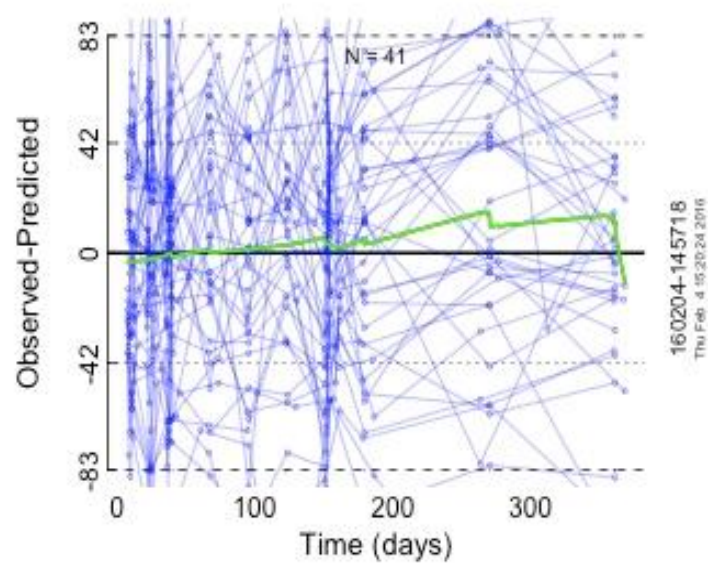

**B**

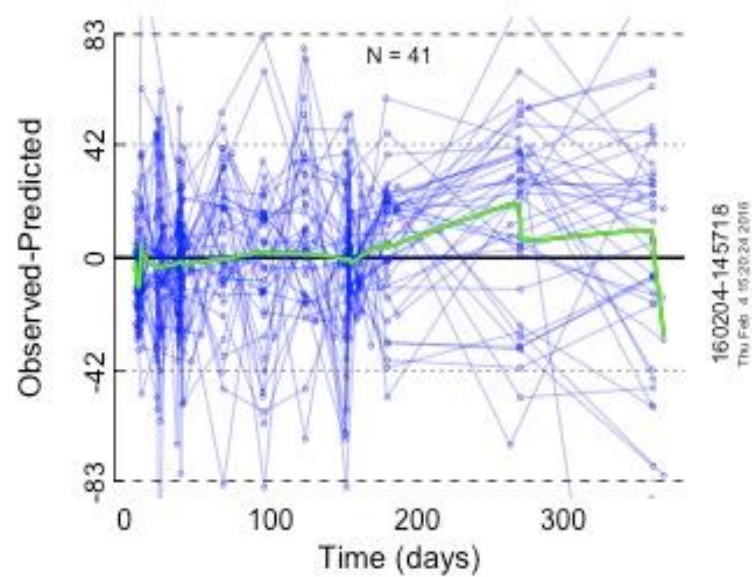

Supplement: Supplementary file 1 [file 1]

Supplemental Figure 1

**A**

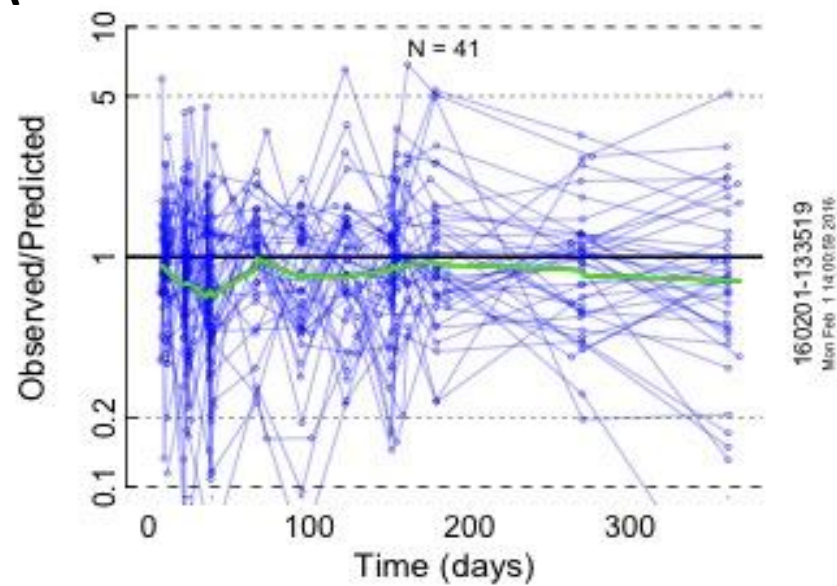

**B**

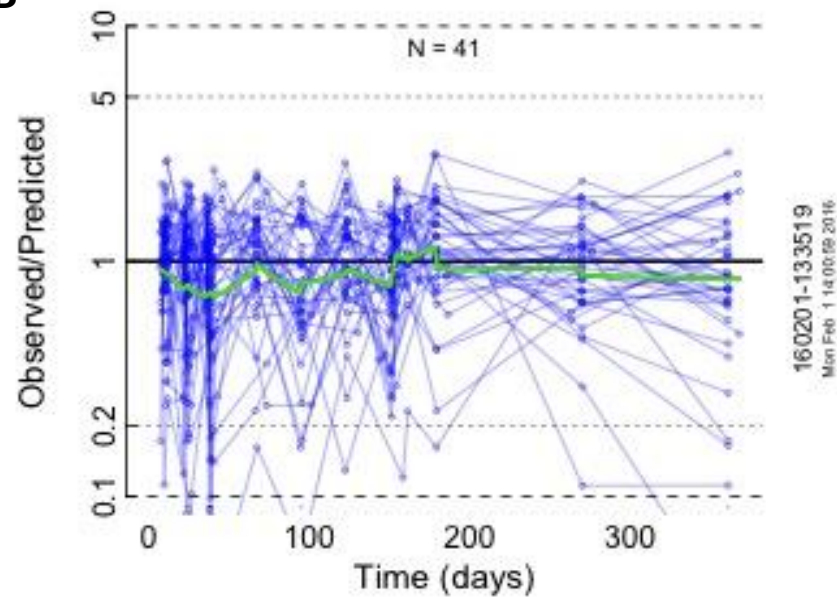

Supplement: Supplementary file 2 [file 1 › HRP470842_sm2.pdf]
